# Supplementary material
Source: publisher figshare collection journal article supplement (https://acs.figshare.com/ndownloader/files/4535989)
Supplement: Supplementary file 1 [file 4535989]

# Taco Complex Templated Syntheses of a Cryptand/Paraquat [2]Rotaxane and a [2]Catenane by Olefin Metathesis

Shijun Li,<sup>†,‡</sup> Ming Liu,<sup>†</sup> Bo Zheng,<sup>†</sup> Kelong Zhu,<sup>†</sup> Feng Wang,<sup>†</sup> Ning  
Li,<sup>†</sup> Xiao-Li Zhao,<sup>§</sup> and Feihe Huang,<sup>\*,†</sup>

<sup>†</sup> Department of Chemistry, Zhejiang University, Hangzhou 310027, P. R. China Fax:  
+86-571-8795-1895; Tel: +86-571-8795-3189; Email address: [fhuang@zju.edu.cn](mailto:fhuang@zju.edu.cn).

<sup>‡</sup> College of Material Chemistry and Chemical Engineering, Hangzhou Normal University, Hangzhou  
310036, P. R. China

<sup>§</sup> Department of Chemistry, East China Normal University, Shanghai 200062, P. R. China

## Supporting Information (11 pages)

|                                                                                                                                                                           |        |
|---------------------------------------------------------------------------------------------------------------------------------------------------------------------------|--------|
| 1. Materials and methods                                                                                                                                                  | S2     |
| 2. Synthesis and characterization of BMP32C10 derivative <b>1</b>                                                                                                         | S2–S3  |
| 3. Synthesis and characterization of cryptand <b>4</b>                                                                                                                    | S4–S5  |
| 4. Synthesis and characterization of [2]rotaxane <b>5</b>                                                                                                                 | S6–S8  |
| 5. Synthesis and characterization of [2]catenane <b>6</b>                                                                                                                 | S9–S11 |
| 6. UV-Vis absorption spectra of the dumbbell-shaped paraquat derivative <b>2</b> ,<br>cyclophane <b>3</b> , cryptand <b>4</b> , rotaxane <b>5</b> , and catenane <b>6</b> | S11    |
| 7. X-ray analysis data of BMP32C10 derivative <b>1</b>                                                                                                                    | S12    |
| 8. X-ray analysis data of [2]catenane <b>6</b>                                                                                                                            | S12    |

## 1. Materials and Methods

BMP32C10-diol<sup>S1</sup> was synthesized according to a literature procedure. Grubbs' II catalyst was purchased from Aldrich. Allyl bromide and NaH were purchased from Alfa Aesar. Solvents were either employed as purchased or dried according to procedures described in the literature. <sup>1</sup>H NMR spectra were collected on a temperature-controlled either 400 MHz or 500 MHz spectrometer. Electrospray ionization mass spectra were obtained on a Bruker Esquire 3000 Plus spectrometer. High-resolution mass spectrometry experiments were performed on a Bruker Daltonics Apex III spectrometer. X-ray diffraction was carried out on a Bruker Smart Apex II.

## 2. Synthesis and characterization of BMP32C10 derivative 1

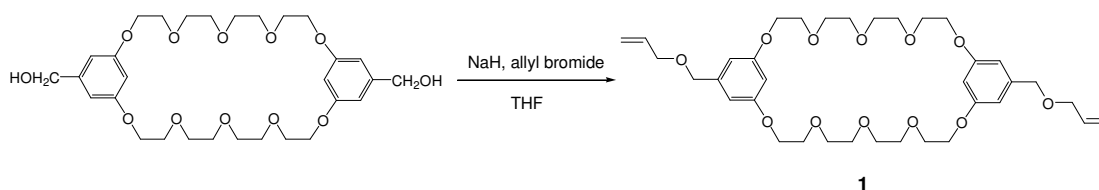

NaH (0.144 g, 6.00 mmol) was added to a 150 mL round-bottomed flask and then THF (30 mL) was added under nitrogen atmosphere. After the mixture was cooled to 0 °C, a solution of BMP32C10-diol (1.19 g, 2.00 mmol) in THF (50 mL) was added dropwise over 1 h. The mixture was stirred for further 30 min and a solution of allyl bromide (0.532 g, 4.40 mmol) in THF (30 mL) was added dropwise during 1 h. After it was stirred for further 12 h at room temperature, the reaction was quenched with MeOH/H<sub>2</sub>O. The solvent was evaporated *in vacuo* and the residue partitioned between CH<sub>2</sub>Cl<sub>2</sub> (100 mL) and water (50 mL). The organic layer was dried with anhydrous Na<sub>2</sub>SO<sub>4</sub> and evaporated *in vacuo* to give a residue, which was purified by column chromatography (SiO<sub>2</sub>: EtOAc/petroleum ether = 2:1) to afford **1** (1.160 g, 86%) as a white solid, mp 63–64 °C. <sup>1</sup>H NMR (400 MHz, CDCl<sub>3</sub>, 22 °C)  $\delta$  (ppm): 6.49 (4 H, s), 6.40 (2 H, d,  $J$  = 1.6 Hz), 5.98–5.88 (2 H, m), 5.31–5.17 (4 H, m), 4.42 (4 H, s), 4.07

(8 H, t,  $J = 4.4$  Hz), 3.99–3.98 (4 H, m), 3.83 (8 H, t,  $J = 4.4$  Hz), and 3.70–3.69 (16 H, m). Low-resolution ESI-MS:  $m/z$  699.3 (100%) [**1** + Na]<sup>+</sup>.

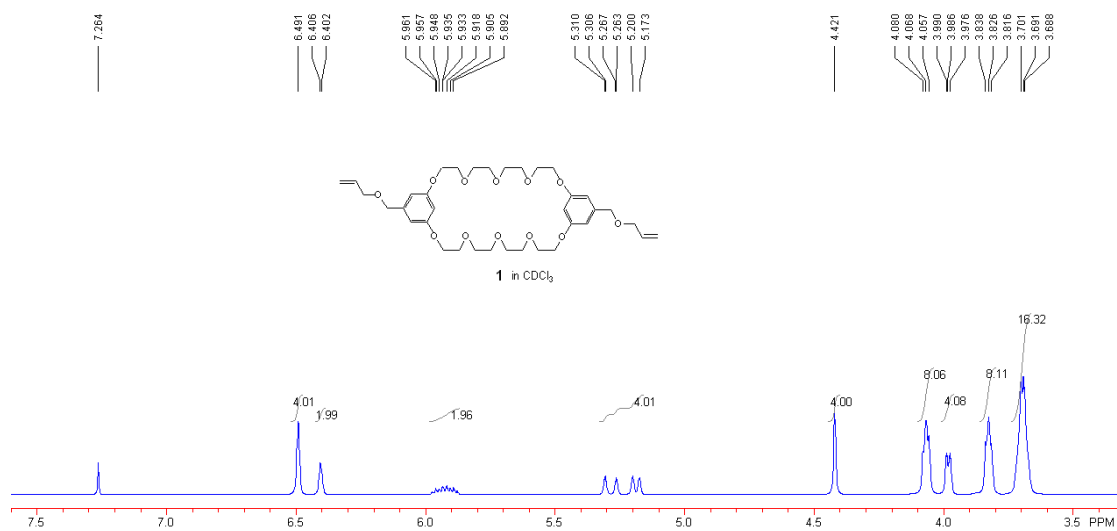

**Figure S1.** <sup>1</sup>H NMR spectrum (400 MHz, CDCl<sub>3</sub>, 22 °C) of BMP32C10 derivative **1**.

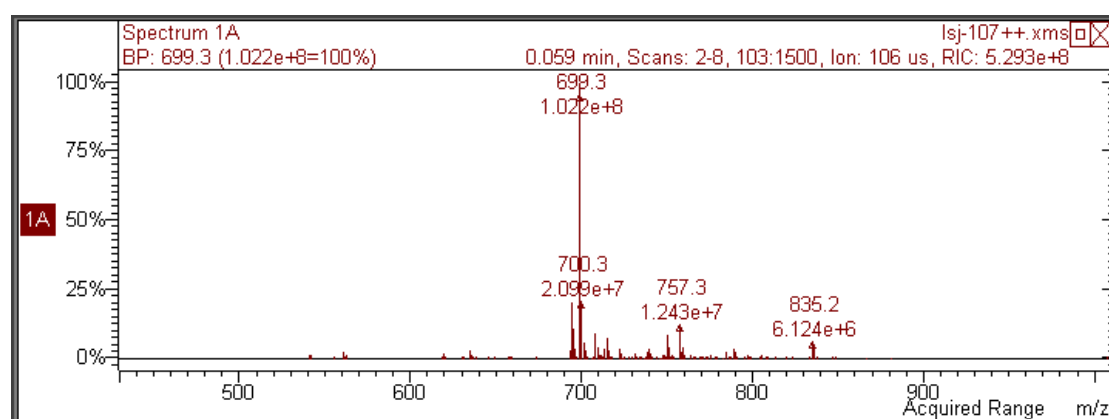

**Figure S2.** Low-resolution ESI-MS spectrum of BMP32C10 derivative **1**.

### 3. Synthesis and characterization of cryptand **4**

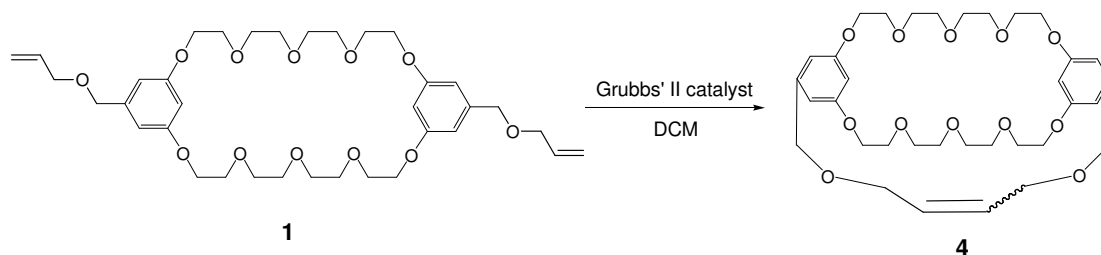

BMP32C10 derivative **1** (0.440 g, 0.624 mmol) was dissolved in DCM (1000 mL). Then a solution of Grubbs' II catalyst in DCM (50 mL) was syringed in over 24 h under nitrogen atmosphere. The mixture was then stirred for 72 h at room temperature. After the reaction mixture was concentrated under reduced pressure, the residue was purified by flash column chromatography (SiO<sub>2</sub>: EtOAc/petroleum ether = 2:1) to afford cryptand **4** (350 mg, 87%) as a colorless oil. <sup>1</sup>H NMR (500 MHz, CD<sub>3</sub>COCD<sub>3</sub>, 22 °C)  $\delta$  (ppm): 6.42 (3 H, d,  $J$  = 2.5 Hz, H<sub>c</sub> of *cis*-isomer), 6.35 (1 H, d,  $J$  = 2.5 Hz, H<sub>c</sub> of *trans*-isomer), 6.31 (2 H, t,  $J$  = 2.0 Hz, H<sub>d</sub>), 5.71–5.69 (0.5 H, t,  $J$  = 3.5 Hz, H<sub>a</sub> of *trans*-isomer), 5.68–5.67 (1.5 H, q,  $J$  = 2.5, 1.5 Hz, H<sub>a</sub> of *cis*-isomer), 4.32 (1 H, s, H<sub>b</sub> of *trans*-isomer), 4.29 (3 H, s, H<sub>b</sub> of *cis*-isomer), 4.02–3.89 (12 H, m), 3.80–3.74 (8 H, m), and 3.64–3.57 (16 H, m). <sup>13</sup>C NMR (125 MHz, CD<sub>3</sub>COCD<sub>3</sub>, 22 °C)  $\delta$  (ppm): 160.1 (*trans*-isomer), 160.0 (*cis*-isomer), 141.6 (*cis*-isomer), 140.7 (*trans*-isomer), 129.8 (*cis*-isomer), 129.4 (*trans*-isomer), 106.1 (*cis*-isomer), 105.8 (*trans*-isomer), 100.4 (*trans*-isomer), 100.2 (*cis*-isomer), 71.5 (*cis*-isomer), 71.4 (*trans*-isomer), 70.7 (*trans*-isomer), 70.6 (*cis*-isomer), 70.4 (*cis*- and *trans*- isomer), 70.0 (*cis*-isomer), 69.5 (*cis*- and *trans*- isomer), 67.5 (*trans*-isomer), 67.5 (*cis*-isomer), and 64.7 (*trans*-isomer). Low-resolution ESI-MS:  $m/z$  671.3 (100%) [**4** + Na]<sup>+</sup>.



#### 4. Synthesis and characterization of [2]rotaxane **5**

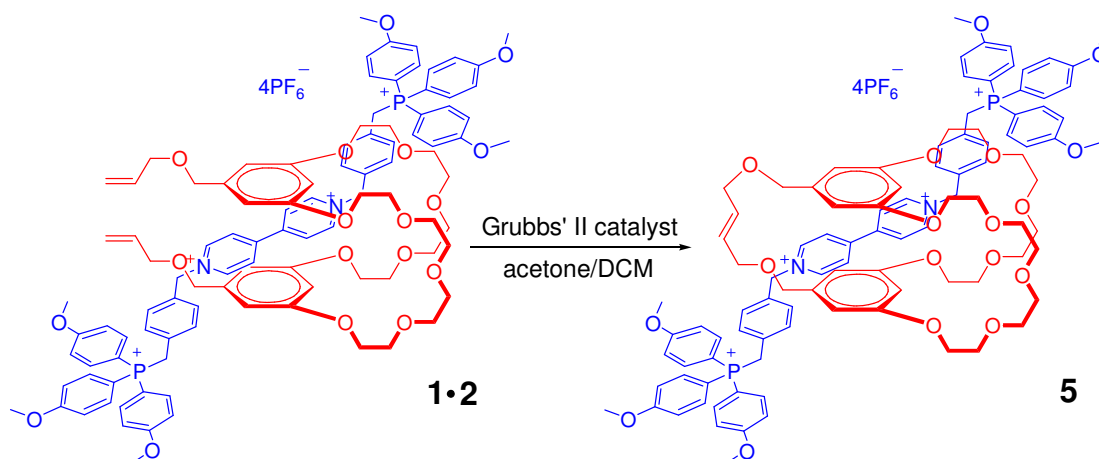

BMP32C10 derivative **1** (13.8 mg, 0.0200 mmol) and the dumbbell-shaped paraquat derivative **2** (32.9 mg, 0.0200 mmol) was dissolved in acetone (5 mL) under nitrogen atmosphere. Then a solution of Grubbs' II catalyst (2.00 mg) in DCM (1 mL) was added at room temperature. The mixture was then stirred for 24 h. The solvent was evaporated *in vacuo* and the residue was purified by column chromatography (SiO<sub>2</sub>: MeOH/NH<sub>4</sub>Cl (2 M)/MeNO<sub>2</sub> = 17:2:1) to afford [2]rotaxane **5** (41.3 mg, 90%) as a yellow solid, mp 65–66 °C. <sup>1</sup>H NMR (500 MHz, CD<sub>3</sub>CN, 22 °C)  $\delta$  (ppm): 8.98 (4 H, d,  $J$  = 7.0 Hz), 7.92 (4 H, d,  $J$  = 7.0 Hz), 7.53 (4 H, d,  $J$  = 8.0 Hz), 7.46–7.41 (12 H, m), 7.16–7.12 (16 H, m), 6.30–6.29 (2 H, m), 5.89 (2 H, s), 5.86 (4 H, s), 5.24 (4 H, d,  $J$  = 3.0 Hz), 4.54 (4 H, d,  $J$  = 14.5 Hz), 3.91 (4 H, s), 3.84 (18 H, s), 3.78–3.68 (12 H, m), 3.64–3.56 (20 H, m), and 3.34–3.31 (4 H, m). <sup>13</sup>C NMR (125 MHz, CD<sub>3</sub>CN, 22 °C)  $\delta$  (ppm): 165.9, 160.0, 146.6, 146.4, 141.2, 137.0 ( $J_{\text{PC}}$  = 11.4 Hz), 134.8, 133.8, 132.9 ( $J_{\text{PC}}$  = 5.2 Hz), 130.8, 126.6, 116.8 ( $J_{\text{PC}}$  = 13.8 Hz), 109.5, 108.7, 108.5, 99.3, 72.9, 72.0, 71.3 ( $J_{\text{PC}}$  = 9.8 Hz), 70.6, 70.3, 68.6, 64.4, 56.7, and 31.5 ( $J_{\text{PC}}$  = 51.6 Hz). Low-resolution ESI-MS:  $m/z$  2320.0 (6%) [**5** + Na]<sup>+</sup>, 2151.2 (15%) [**5** – PF<sub>6</sub>]<sup>+</sup>, 1004.0 (100%) [**5** – 2PF<sub>6</sub>]<sup>2+</sup>, 931.0 (30%) [**5** – 2PF<sub>6</sub> – HPF<sub>6</sub>]<sup>2+</sup>, 757.4 (18%) [**5** – OCH<sub>3</sub> – CH<sub>3</sub> + H<sub>3</sub>O]<sup>3+</sup>, 700.4 (12%) [**5** – PF<sub>6</sub> – 2OCH<sub>3</sub> – CH<sub>3</sub> + Na]<sup>3+</sup>, 611.5 (8%) [**5** – 3PF<sub>6</sub> – OCH<sub>3</sub> – CH<sub>3</sub> + H<sub>3</sub>O]<sup>3+</sup>, and 455.3 (38%) [**5** – 3PF<sub>6</sub> – 2OCH<sub>3</sub> + Na]<sup>4+</sup>. High-resolution ESI-MS:  $m/z$  calcd for [**5** – 2PF<sub>6</sub>]<sup>2+</sup> C<sub>102</sub>H<sub>114</sub>F<sub>12</sub>N<sub>2</sub>O<sub>18</sub>P<sub>4</sub>, 1003.8430, found 1003.8343,

error  $-8.7$  ppm; and calcd for  $[\mathbf{5} - 3\text{PF}_6]^{3+}$   $\text{C}_{102}\text{H}_{114}\text{F}_6\text{N}_2\text{O}_{18}\text{P}_3$ ,  $620.9072$ , found  $620.9048$ , error  $-3.9$  ppm.

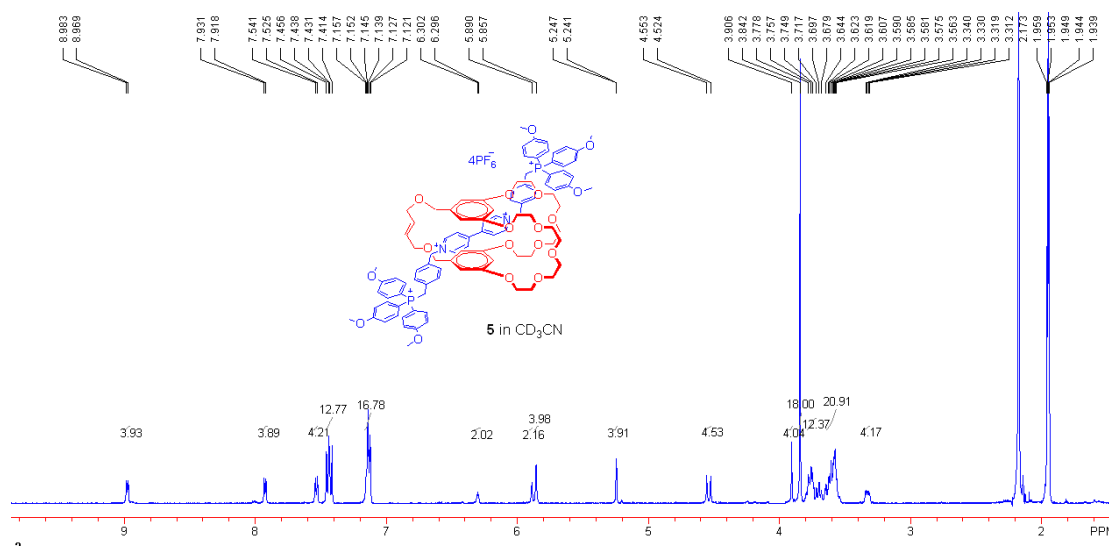

**Figure S6.**  $^1\text{H}$  NMR spectrum (500 MHz,  $\text{CD}_3\text{CN}$ , 22 °C) of rotaxane **5**.

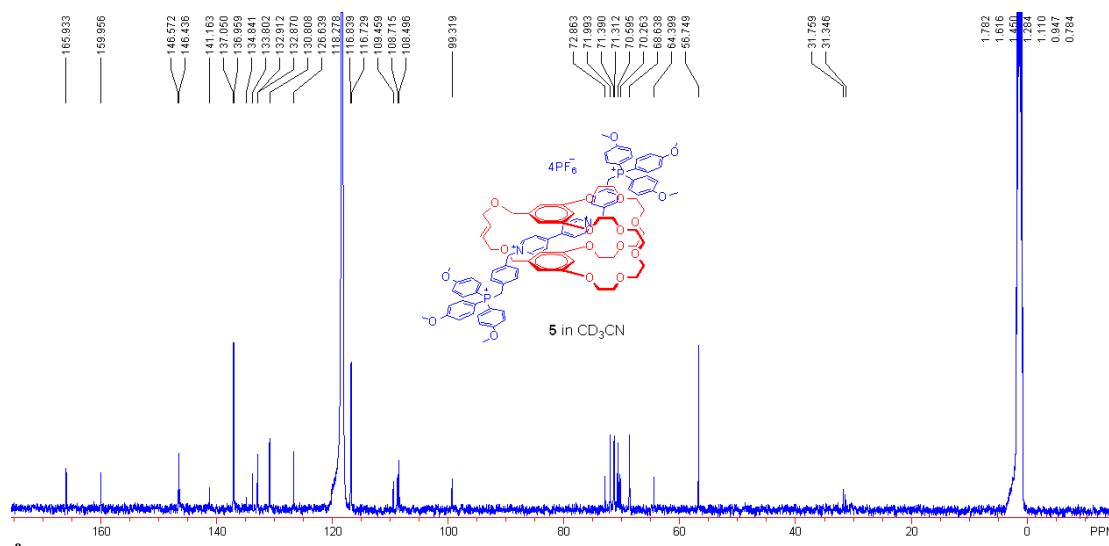

**Figure S7.**  $^{13}\text{C}$  NMR spectrum (125 MHz,  $\text{CD}_3\text{CN}$ , 22 °C) of rotaxane **5**.

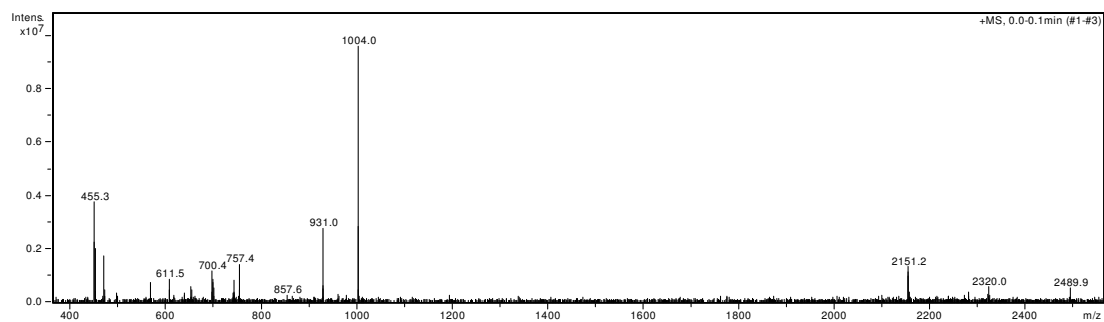

**Figure S8.** Low-resolution ESI-MS spectrum of rotaxane **5**.

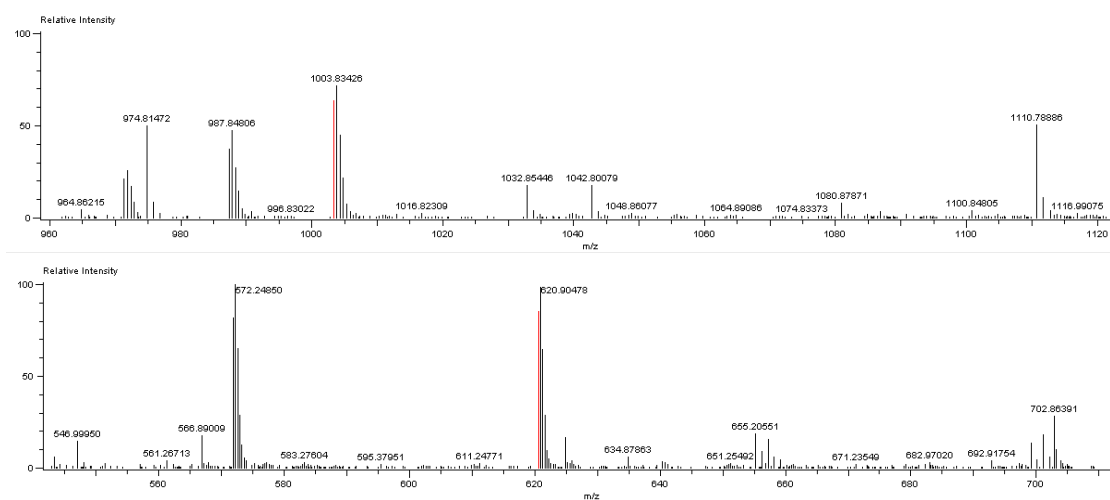

**Figure S9.** High-resolution ESI-MS spectrum of rotaxane **5**.



## 5. Synthesis and characterization of [2]catenane **6**

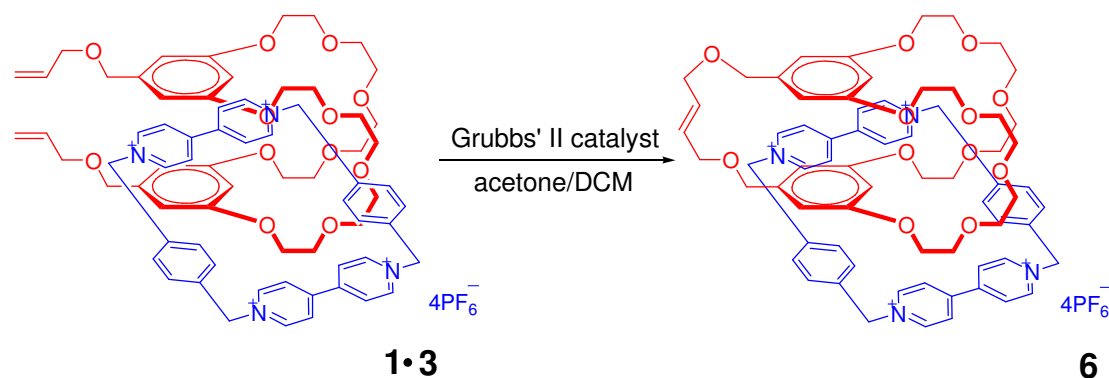

BMP32C10 derivative **1** (20.0 mg, 0.0284 mmol) and cyclophane **3** (26.0 mg, 0.0236 mmol) was dissolved in acetone (20 mL) under nitrogen atmosphere. Then a solution of Grubbs' II catalyst (2.00 mg) in DCM (4 mL) was added at room temperature. The mixture was then stirred for 24 h. The solvent was evaporated *in vacuo* and the residue was purified by column chromatography (SiO<sub>2</sub>: MeOH/NH<sub>4</sub>Cl (2 M)/MeNO<sub>2</sub> = 17:2:1) to afford [2]catenane **6** (35.1 mg, 85%) as a yellow solid, mp 275–276 °C. <sup>1</sup>H NMR (500 MHz, CD<sub>3</sub>CN, 22 °C)  $\delta$  (ppm): 8.93 (8 H, br), 7.70 (16 H, br), 6.10 (2 H, br), 5.74 (10 H, br), and 4.08–3.62 (44 H, m). <sup>1</sup>H NMR (125 MHz, CD<sub>3</sub>CN, 22 °C)  $\delta$  (ppm): 159.8, 145.8, 137.0, 131.6, 127.0, 126.4, 71.8, 71.4, 70.5, 70.2, 68.4, and 65.7. Low-resolution ESI-MS:  $m/z$  1605.6 (75%) [**6** – PF<sub>6</sub> + H]<sup>+</sup>, and 729.8 (100%) [**6** – 2PF<sub>6</sub>]<sup>2+</sup>. High-resolution ESIMS:  $m/z$  calcd for [**6** – 2PF<sub>6</sub>]<sup>2+</sup> C<sub>70</sub>H<sub>80</sub>F<sub>12</sub>N<sub>4</sub>O<sub>12</sub>P<sub>2</sub>, 729.2528, found 729.2542, error 1.9 ppm.

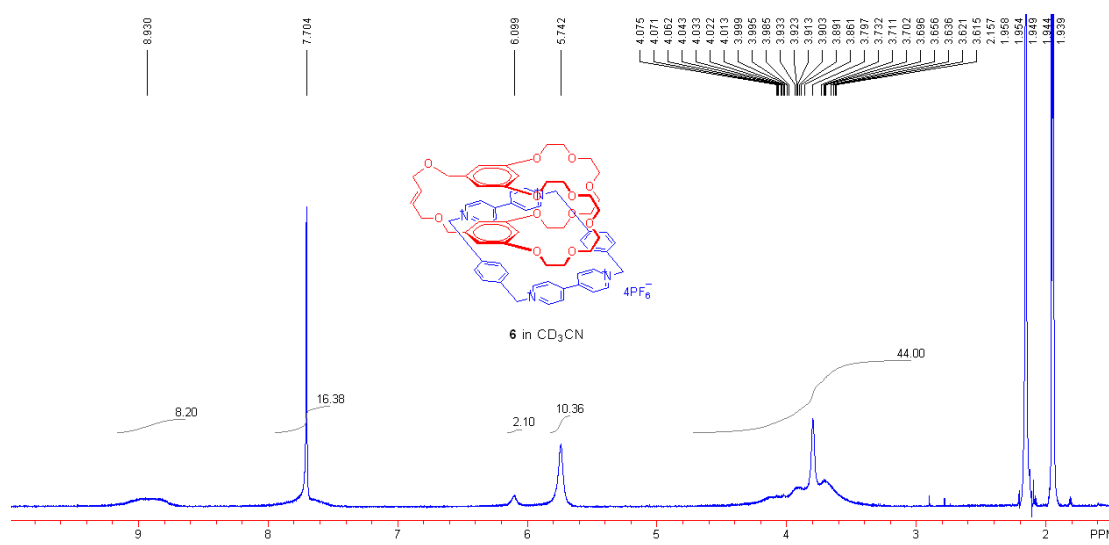

**Figure S10.** <sup>1</sup>H NMR spectrum (500 MHz, CD<sub>3</sub>CN, 22 °C) of catenane **6**.

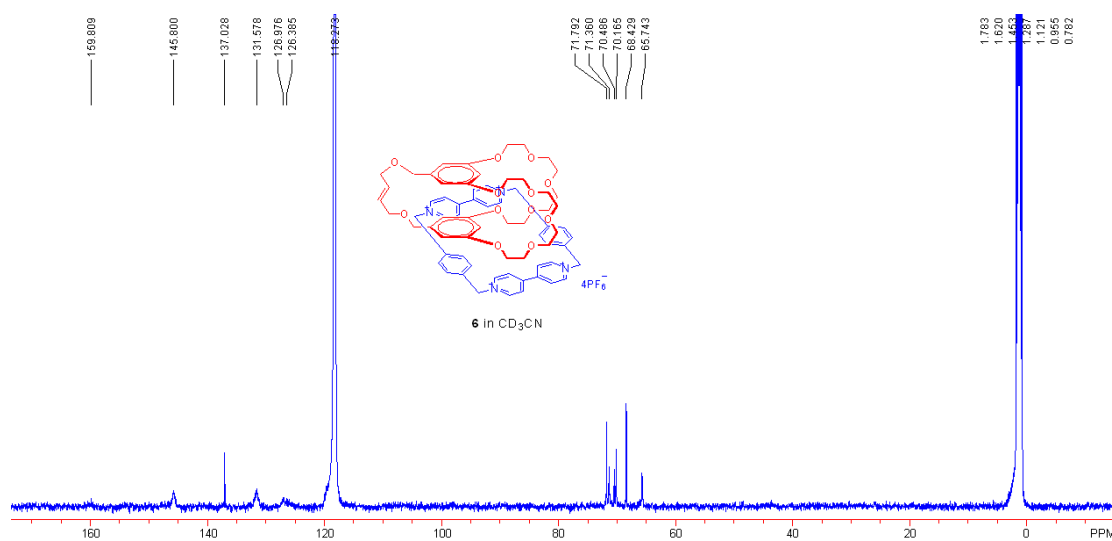

**Figure S11.** <sup>13</sup>C NMR spectrum (125 MHz, CD<sub>3</sub>CN, 22 °C) of catenane **6**.

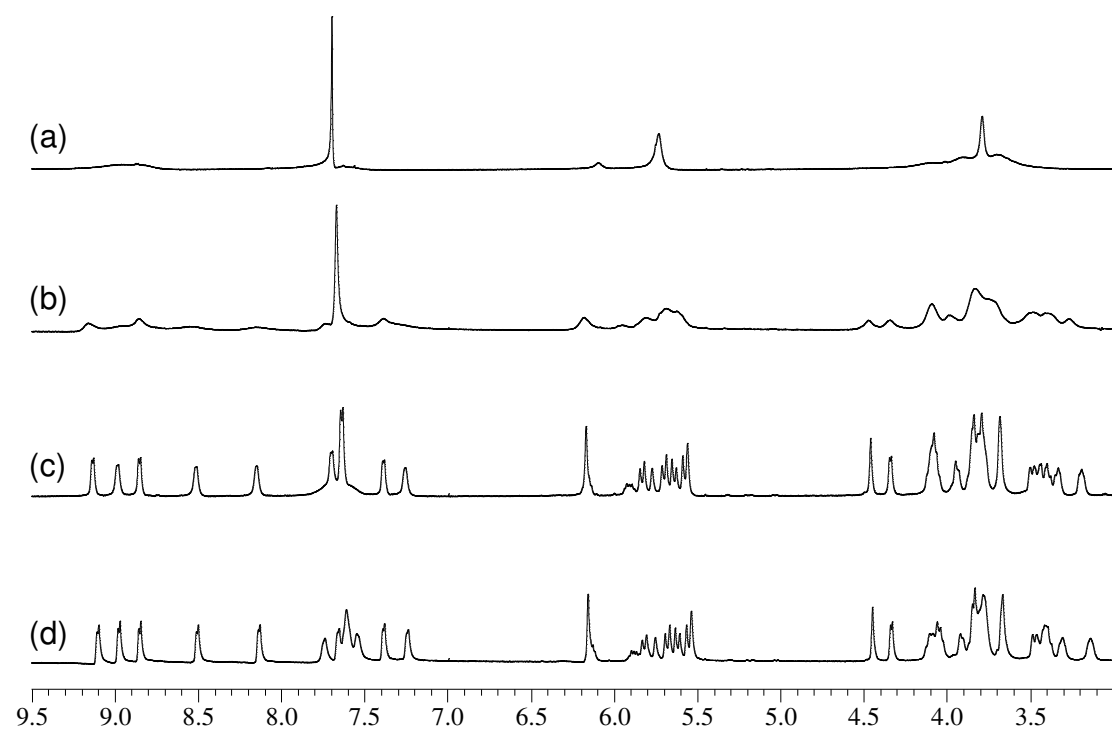

**Figure S12.** The partial temperature-dependent <sup>1</sup>H NMR spectra (125 MHz, CD<sub>3</sub>CN) of catenane **6** at 25 °C (a), 0 °C (b), -20 °C (c), and -40 °C (d).

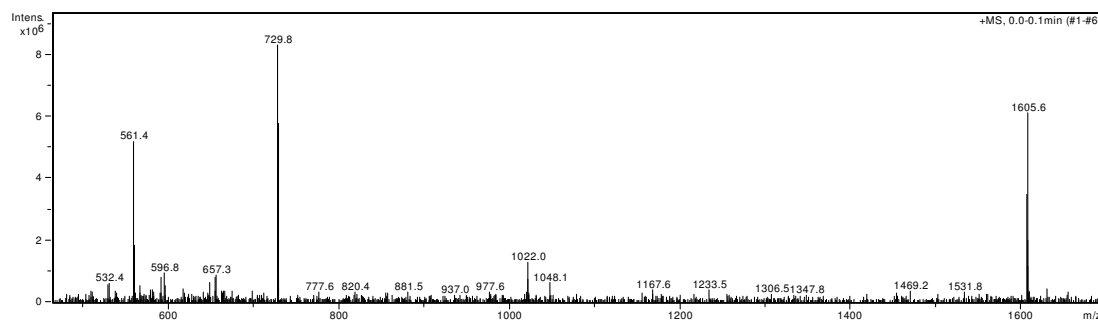

**Figure S13.** Low-resolution ESI-MS spectrum of catenane **6**.

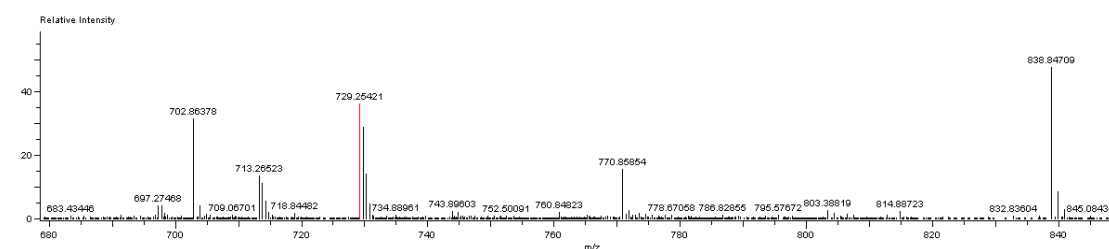

**Figure S14.** High-resolution ESI-MS spectrum of catenane **6**.

## 6. UV-Vis absorption spectra of the dumbbell-shaped paraquat derivative **2**, cyclophane **3**, cryptand **4**, rotaxane **5**, and catenane **6**

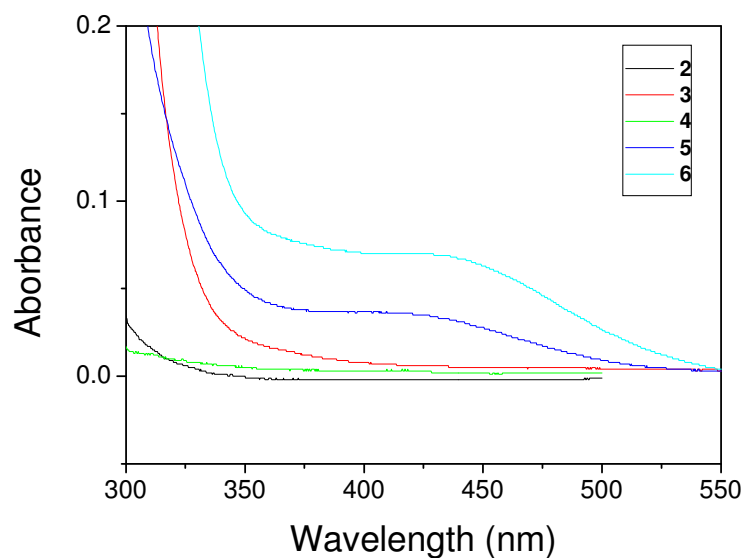

**Figure S15.** The UV-Vis absorption spectra of the dumbbell-shaped paraquat derivative **2**, cyclophane **3**, cryptand **4**, rotaxane **5**, and catenane **6** at a concentration of 0.1 mM in acetonitrile.

### 7. X-ray analysis data of BMP32C10 derivative **1**

Crystallographic data: block, colorless,  $0.652 \times 0.426 \times 0.229 \text{ mm}^3$ ,  $\text{C}_{36}\text{H}_{52}\text{O}_{12}$ ,  $FW$  676.79, triclinic, space group  $P^{-1}$ ,  $a = 7.0217(2)$ ,  $b = 11.5023(4)$ ,  $c = 12.3086(4) \text{ \AA}$ ,  $\alpha = 113.4510(10)^\circ$ ,  $\beta = 94.5990(10)^\circ$ ,  $\gamma = 97.8820(10)^\circ$ ,  $V = 893.40(5) \text{ \AA}^3$ ,  $Z = 2$ ,  $D_c = 1.258 \text{ g cm}^{-3}$ ,  $T = 173(2) \text{ K}$ ,  $\mu = 0.094 \text{ mm}^{-1}$ , 10340 measured reflections, 3124 independent reflections, 229 parameters, 0 restraints,  $F(000) = 364$ ,  $R_1 = 0.0360$ ,  $wR_2 = 0.0932$  (all data),  $R_1 = 0.0338$ ,  $wR_2 = 0.0908$  [ $I > 2\sigma(I)$ ], max. residual density  $0.167 \text{ e}\cdot\text{\AA}^{-3}$ , and goodness-of-fit ( $F^2$ ) = 1.052.

### 8. X-ray analysis data of [2]catenane **6**

Crystallographic data: block, orange,  $0.529 \times 0.220 \times 0.084 \text{ mm}^3$ ,  $\text{C}_{70}\text{H}_{79}\text{F}_{24}\text{N}_4\text{O}_{12}\text{P}_4$ ,  $FW$  1748.25, triclinic, space group  $P^{-1}$ ,  $a = 13.3566(7)$ ,  $b = 13.8761(7)$ ,  $c = 26.4176(13) \text{ \AA}$ ,  $\alpha = 77.624(2)^\circ$ ,  $\beta = 84.730(2)^\circ$ ,  $\gamma = 78.959(2)^\circ$ ,  $V = 4687.3(4) \text{ \AA}^3$ ,  $Z = 2$ ,  $D_c = 1.239 \text{ g cm}^{-3}$ ,  $T = 173(2) \text{ K}$ ,  $\mu = 0.179 \text{ mm}^{-1}$ , 54027 measured reflections, 16311 independent reflections, 1036 parameters, 0 restraints,  $F(000) = 1798$ ,  $R_1 = 0.1395$ ,  $wR_2 = 0.3084$  (all data),  $R_1 = 0.1030$ ,  $wR_2 = 0.2814$  [ $I > 2\sigma(I)$ ], max. residual density  $1.828 \text{ e}\cdot\text{\AA}^{-3}$ , and goodness-of-fit ( $F^2$ ) = 0.978.

### References:

S1. Gibson, H. W.; Nagvekar, D. S. *Can. J. Chem.* **1997**, 75, 1375–1384.
